# Supplementary material for: Ageing People Living with HIV/AIDS, PLWHA; More Dental Challenges; the Romanian Dental Professional’s Point of View
Source: MDPI journal article supplement (doi:10.3390/life13051096), 2023-04-27
Supplement: s1 [file s1]

## Responses to the questionnaire

1. What is your role in the dental practice? dentists, dental technicians, dental nurses, dental students, other (such as receptionist, janitor, and curries).

|                    |     |        |
|--------------------|-----|--------|
| dentists           | 562 | 51.04% |
| dental technicians | 209 | 18.98% |
| other              | 88  | 7.99%  |
| dental nurses      | 176 | 15.99% |
| dental student     | 66  | 5.99%  |

2. How old are you?

|                |          |
|----------------|----------|
| Mean           | 39.09991 |
| Standard Error | 0.363241 |
| Median         | 40       |

3. How long have you been practicing in the dental office?

|             |              |
|-------------|--------------|
| 1-2 years   | 154 (13.99%) |
| 3-5 years   | 121 (10.99%) |
| 6-10 years  | 187 (16.98%) |
| 11-20 years | 275 (24.98%) |
| >20 years   | 364 (33.06%) |

4. Do you know infectious diseases prophylaxis, were you trained for this? Yes/no 369 (58.04%)/ 462 (41.96%)

5. Where is the dental office where you practice located? rural/urban 110 (9.9%)/991 (90.01%)

6. You are vaccinated against: VHA/VHB/influenza/COVID-19/tetanus 112/987/569/789/1101

7. Have you worked with HIV infected patients? Yes/no

|     |     |       |
|-----|-----|-------|
|     |     | P%    |
| yes | 386 | 35.06 |
| no  | 715 | 64.94 |

8. Do you know HIV Pre-Exposure Prophylaxis methods? Yes/no

|     |     |       |
|-----|-----|-------|
|     |     | P%    |
| yes | 913 | 82.92 |
| no  | 188 | 17.08 |

9. Do you know HIV Post- Exposure Prophylaxis methods? Yes/no

|     |     | P%    |
|-----|-----|-------|
| yes | 715 | 64.94 |
| no  | 386 | 35.06 |

10. Have been HIV exposed during dental practice? Yes/no

|     |     | P%    |
|-----|-----|-------|
| yes | 254 | 23.07 |
| no  | 847 | 76.93 |

11. Did you refuse to work with an HIV infected patient? Yes/no

|     |      | P%    |
|-----|------|-------|
| yes | 89   | 8.08  |
| no  | 1012 | 91.92 |

12. If you can choose, would you choose to avoid treating an HIV infected patient?  
Yes/no

|     |     | P%    |
|-----|-----|-------|
| yes | 517 | 46.96 |
| no  | 584 | 53.04 |

13. How do you find out that your patient is HIV infected? I ask directly all the patients/I run a questionnaire/I do not ask

396/618/87

14. Are you afraid to get HIV infected working in the dental office? Yes/no

|    |     | P%    |
|----|-----|-------|
| da | 594 | 53.95 |
| nu | 507 | 46.05 |

15. If the patient is HIV infected, you are more careful than usual/ refuse to treat the patient/do nothing special

|                                 |     | P%    |
|---------------------------------|-----|-------|
| do nothing special              | 396 | 35.97 |
| refuse to treat the patient     | 77  | 6.99  |
| you are more careful than usual | 628 | 57.04 |

16. Have you taken ARV for HIV Post- Exposure Prophylaxis? Yes/no

|     |      |       |
|-----|------|-------|
|     |      | P%    |
| yes | 33   | 3.00  |
| no  | 1068 | 97.00 |

17. When you work with an HIV infected patient do you treat them different according to HIV stage or treatment? Yes/no

|     |     |       |
|-----|-----|-------|
|     |     | P%    |
| yes | 396 | 35.97 |
| no  | 705 | 64.03 |

18. Are you using enhanced protective equipment when working with HIV infected? Yes/no

|     |     |       |
|-----|-----|-------|
|     |     | P%    |
| yes | 660 | 59.95 |
| no  | 441 | 40.05 |

19. HIV is transmitted: by direct contact or touch/through body fluids, blood/sexual/mother to child at birth

66/1101/900/809

20. HIV is diagnosed by: rapid tests/ rT-PCR/serology tests

37/1101/667

21. Have you worked with an HIV infected patient? Yes/no

|     |     |       |
|-----|-----|-------|
|     |     | P%    |
| yes | 363 | 32.97 |
| no  | 738 | 67.03 |

22. Do you consider that ageing HIV patients need more dental care? Yes/no

|     |     |       |
|-----|-----|-------|
|     |     | P%    |
| yes | 836 | 75.93 |
| no  | 265 | 24.07 |

23. Are you afraid to work with an HIV infected patient? Yes/no

|     |     |       |
|-----|-----|-------|
|     |     | P%    |
| yes | 429 | 38.96 |
| no  | 672 | 61.04 |

24. Did you refuse to speak with an HIV infected patient in the dental office? Yes/no

|     |      | P%    |
|-----|------|-------|
| yes | 66   | 5.99  |
| no  | 1035 | 94.01 |

25. Are you HIV infected? Yes/no

0/1101

26. Are you willing to get an HIV vaccine as soon as one will be available.? Yes/no

|     |     | P%    |
|-----|-----|-------|
| yes | 616 | 55.95 |
| no  | 485 | 44.05 |
